# Supplementary material for: Mid-Regional Pro-Adrenomedullin in Combination With Pediatric Early Warning Scores for Risk Stratification of Febrile Children Presenting to the Emergency Department: Secondary Analysis of a Nonprespecified United Kingdom Cohort Study*
Source: PubMed Central journal article supplement (PMC9708078; doi:10.1097/pcc.0000000000003075), 2022-10-14
Supplement: pcc-23-0980-s007.pdf [file pcc-23-0980-s007.pdf]

Key:  = ≥50%     = 40 – 49%     = 30 – 39%     = 20 – 29%     = 10 – 19%     = <10%

4a.

|           |                               | National PEWS ≥ 6             |                                 | National PEWS < 6            |                 |                                |                 |                                |
|-----------|-------------------------------|-------------------------------|---------------------------------|------------------------------|-----------------|--------------------------------|-----------------|--------------------------------|
| PCT ≥ 0.5 | MR-proADM ≥ 0.7               | 38.5% (13.9% - 68.4%)<br>5/13 | MR-proADM < 0.7                 | 16.0% (4.5% - 36.1%)<br>4/25 | MR-proADM ≥ 0.7 | 31.2% (21.1% - 42.7%)<br>24/77 | MR-proADM < 0.7 | 12.6% (7.7% - 19.0%)<br>19/151 |
|           | 23.7% (11.4% - 40.2%)<br>9/38 |                               | 18.9% (14.0% - 24.6%)<br>43/228 |                              |                 |                                |                 |                                |
| PCT < 0.5 | 16.9% (8.4% - 29.0%)<br>10/59 |                               | 8.0% (5.7% - 10.9%)<br>37/461   |                              |                 |                                |                 |                                |
|           | MR-proADM ≥ 0.7               | 30.0% (6.7% - 65.2%)<br>3/10  | MR-proADM < 0.7                 | 14.3% (5.9% - 27.2%)<br>7/49 | MR-proADM ≥ 0.7 | 22.0% (12.3% - 34.7%)<br>13/59 | MR-proADM < 0.7 | 6.0% (3.9% - 8.8%)<br>42/402   |

4b.

|           |                               | National PEWS ≥ 6             |                                 | National PEWS < 6            |                 |                                |                 |                                |
|-----------|-------------------------------|-------------------------------|---------------------------------|------------------------------|-----------------|--------------------------------|-----------------|--------------------------------|
| PCT ≥ 0.5 | MR-proADM ≥ 0.7               | 38.5% (13.9% - 68.4%)<br>5/13 | MR-proADM < 0.7                 | 16.0% (4.5% - 36.1%)<br>4/25 | MR-proADM ≥ 0.7 | 31.2% (21.1% - 42.7%)<br>24/77 | MR-proADM < 0.7 | 12.6% (7.7% - 19.0%)<br>19/151 |
|           | 23.7% (11.4% - 40.2%)<br>9/38 |                               | 18.9% (14.0% - 24.6%)<br>43/228 |                              |                 |                                |                 |                                |
| PCT < 0.5 | 16.9% (8.4% - 29.0%)<br>10/59 |                               | 8.0% (5.7% - 10.9%)<br>37/461   |                              |                 |                                |                 |                                |
|           | MR-proADM ≥ 0.7               | 30.0% (6.7% - 65.2%)<br>3/10  | MR-proADM < 0.7                 | 14.3% (5.9% - 27.2%)<br>7/49 | MR-proADM ≥ 0.7 | 22.0% (12.3% - 34.7%)<br>13/59 | MR-proADM < 0.7 | 6.0% (3.9% - 8.8%)<br>42/402   |

4c.

|           |                                | National PEWS ≥ 6             |                                 | National PEWS < 6             |                 |                                |                 |                                 |
|-----------|--------------------------------|-------------------------------|---------------------------------|-------------------------------|-----------------|--------------------------------|-----------------|---------------------------------|
| PCT ≥ 0.5 | MR-proADM ≥ 0.7                | 53.8% (25.1% - 80.8%)<br>7/13 | MR-proADM < 0.7                 | 32.0% (14.9% - 53.5%)<br>8/25 | MR-proADM ≥ 0.7 | 54.5% (42.8% - 65.9%)<br>42/77 | MR-proADM < 0.7 | 34.4% (26.9% - 42.6%)<br>52/151 |
|           | 39.5% (24.0% - 56.6%)<br>15/38 |                               | 41.2% (34.8% - 47.9%)<br>94/228 |                               |                 |                                |                 |                                 |
| PCT < 0.5 | 13.6% (6.0% - 25.0%)<br>8/59   |                               | 13.9% (10.9% - 17.4%)<br>64/461 |                               |                 |                                |                 |                                 |
|           | MR-proADM ≥ 0.7                | 20.0% (2.5% - 55.6%)<br>2/10  | MR-proADM < 0.7                 | 12.2% (4.6% - 24.8%)<br>6/49  | MR-proADM ≥ 0.7 | 13.6% (6.0% - 25.0%)<br>8/59   | MR-proADM < 0.7 | 13.9% (10.7% - 17.7%)<br>56/402 |
